# Supplementary material
Source: PubMed Central journal article supplement (PMC5785442)

$\text{N}_2\text{O}$  reactivity of a  $[\text{Cu}_2\text{S}]$  complex implies that tetranuclearity imparts oxidative stability to the  $\text{Cu}_2$  site in nitrous oxide reductase.

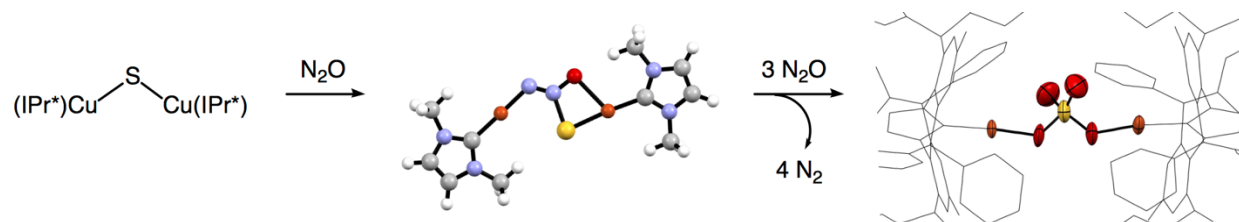

Supplement: NIHMS935073-supplement-TOC.pdf [file NIHMS935073-supplement-TOC.pdf]
